# Supplementary material for: Lignocellulose Nanofibre Obtained from Agricultural Wastes of Tomato, Pepper and Eggplants Improves the Performance of Films of Polyvinyl Alcohol (PVA) for Food Packaging
Source: MDPI journal article supplement (doi:10.3390/foods10123043), 2021-12-08
Supplement: s1 [file s1]

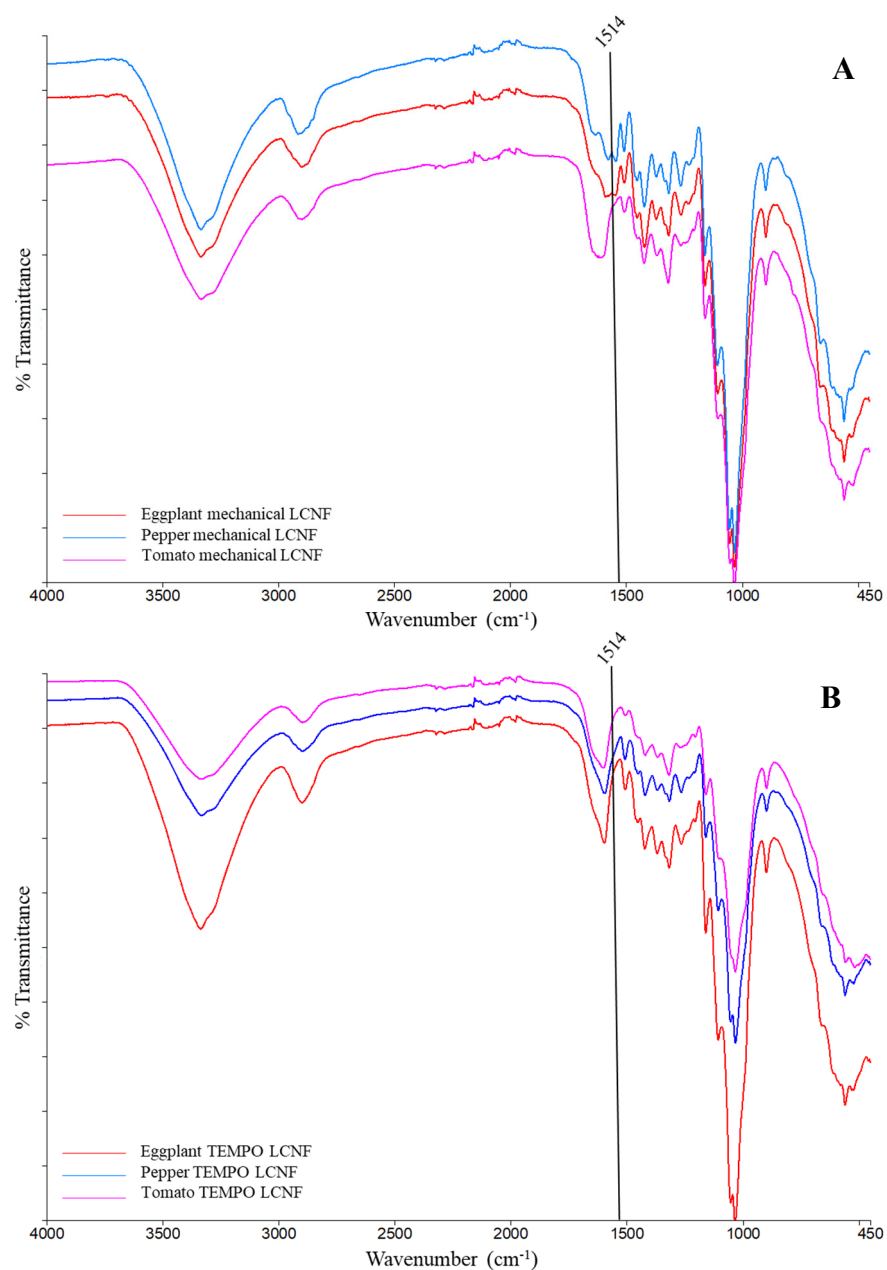

Figure S1. FT-IR spectra of mechanical-LCNF (A), and TEMPO-LCNF (B) from tomato, pepper, and eggplant.

Table S1. Antioxidant power (AOP) of mechanical and TEMPO-LCNF from tomato, pepper, and eggplant.

| Sample   | Pre-treatment | AOP (%) $\pm$ SD |
|----------|---------------|------------------|
| Tomato   | Mechanical    | 25.16 $\pm$ 0.09 |
|          | TEMPO         | 13.96 $\pm$ 0.19 |
| Pepper   | Mechanical    | 20.55 $\pm$ 0.06 |
|          | TEMPO         | 15.44 $\pm$ 0.12 |
| Eggplant | Mechanical    | 26.64 $\pm$ 0.15 |
|          | TEMPO         | 13.93 $\pm$ 0.07 |
